# Supplementary material for: Study of Progression of COVID-19 in Indian Population based on Transcriptomic Approach
Source: Preprints.org preprint supplement (doi:10.20944/preprints202212.0431.v1), 2022-12-23
Supplement: Supplementary file 1 [file Supp_1.xlsx]

## Sheet: Supp_1
Functions	Genes	Adjusted P-value	Rich factor	Type
Metabolism of pantoethanate	3	0.0221344	42.8571	Biological Processes
Degranulation of neutrophils	44	3.17672e-21	9.14761	Biological Processes
Regulation of inflammatory response	15	4.45747e-05	7.28155	Biological Processes
Positive regulation of NF-κB	9	0.0493061	5.80645	Biological Processes
Negative regulation of cytokine production	10	0.0412852	5.49451	Biological Processes
Starch and sucrose metabolism	5	0.0100822	13.8889	Biological Pathways
Legionellosis	6	0.0100822	10.5263	Biological Pathways
