# Supplementary material for: Study of Progression of COVID-19 in Indian Population based on Transcriptomic Approach
Source: Preprints.org preprint supplement (doi:10.20944/preprints202212.0431.v1), 2022-12-23
Supplement: Supplementary file 2 [file Supp_2.xlsx]

## Sheet: Supp_2
Functions	Genes	Adjusted P-value	Rich factor	Type
Regulation of neutrophil degranulation	4	0.0206962	80	Overexpressed genes
Regulation of mast cell degranulation	7	0.0162515	43.75	Overexpressed genes
Catabolism of amyloi precursor	6	0.0411083	42.8571	Overexpressed genes
Positive regulation of superoxide anion generation	6	0.0411083	42.8571	Overexpressed genes
Type I interferon signaling pathway	24	1.54678e-07	36.9231	Overexpressed genes
Activation of microglial cell	8	0.0233408	36.3636	Overexpressed genes
Positive regulation of endopeptidase activity	10	0.0126729	33.3333	Overexpressed genes
Positive regulation of p38MAPK cascade	8	0.0398932	33.3333	Overexpressed genes
Activation of macrophages	11	0.0138284	30.5556	Overexpressed genes
Regulation of viral genome replication	20	7.73142e-05	29.8507	Overexpressed genes
Osteoclast differentiation	37	3.58609e-09	29.1339	Overexpressed genes
NOD-like receptor signaling pathway	37	2.04867e-05	21.6667	Overexpressed genes
Leukocyte transendothelial migration	28	1.47836e-05	20.442	Overexpressed genes
Natural killer cell mediated cytotoxicity	24	0.00300562	28.5714	Overexpressed genes
C-type lectin receptor signaling pathway	21	0.00233546	20	Overexpressed genes
Legionellosis	14	0.00275965	20.1923	Overexpressed genes
Fc gamma R-mediated phagocytosis	26	8.58007e-06	20.2247	Overexpressed genes
TNF signaling pathway	21	0.00402577	18	Overexpressed genes
Neutrophil extracellular trap formation	35	0.00023679	18.4874	Overexpressed genes
Lipid and atherosclerosis	36	0.0012382	15.9236	Overexpressed genes
SRP-dependent cotranslation	54	1.68235e-47	60	Underexpressed genes
Catabolsim of mRNA	56	1.03863e-43	49.5575	Underexpressed genes
Biosynthesis of peptides	59	1.01142e-36	36.4198	Underexpressed genes
ribosomal small subunit assembly	6	0.00599703	35.2941	Underexpressed genes
Biogenesis of small unit of ribosomes	12	8.81235e-06	30	Underexpressed genes
ribosome assembly	14	1.98799e-06	28	Underexpressed genes
p53 signalling	6	0.0273891	27.2727	Underexpressed genes
Metabolism of rRNA	44	3.17998e-21	27.1605	Underexpressed genes
Processing of ncRNA	45	3.5599e-18	22.3881	Underexpressed genes
Biosynthesis of macromolecules	62	3.96647e-22	19.7452	Underexpressed genes
Ribosome	55	4.09529e-33	34.8101	Underexpressed genes
Coronavirus disease	56	8.80498e-25	24.1379	Underexpressed genes
Viral myocarditis	10	0.0173607	16.6667	Underexpressed genes
