# Supplementary material for: Study of Progression of COVID-19 in Indian Population based on Transcriptomic Approach
Source: Preprints.org preprint supplement (doi:10.20944/preprints202212.0431.v1), 2022-12-23
Supplement: Supplementary file 3 [file Supp_3.xlsx]

## Sheet: Supp_3
Functions	Genes	Adjusted P value	Rich factor	Type
Regulation of podosome assembly	5	0.000235772	50	Overexpressed genes
Positive regulation of EGF activation	5	0.000408775	45.4545	Overexpressed genes
Catabolism of pyrimidine	5	0.000408775	45.4545	Overexpressed genes
TLR 4 signaling pathway	7	0.000192997	35	Overexpressed genes
Innate immune response in mucosa	7	0.000273087	33.3333	Overexpressed genes
Neutrophil degranulation	125	4.48418e-42	25.9875	Overexpressed genes
Regulation of erythrocyte differentiation	9	0.000529768	24.3243	Overexpressed genes
Positive regulation of IL-1 beta production	13	5.5132e-05	23.2143	Overexpressed genes
Positive regulation of ROS metabolism	11	0.000279727	22.449	Overexpressed genes
Platelet degranulation	28	8.30572e-09	22.4	Overexpressed genes
Starch and sucrose metabolism	10	0.00319732	27.7778	Overexpressed genes
Bladder cancer	11	0.00318973	26.8293	Overexpressed genes
Type II diabetes mellitus	12	0.00291408	26.087	Overexpressed genes
Legionellosis	13	0.00318973	22.807	Overexpressed genes
Galactose metabolism	7	0.0483699	22.5806	Overexpressed genes
Acute myeloid leukemia	15	0.00291408	22.3881	Overexpressed genes
Complement and coagulation cascades	15	0.0128775	17.6471	Overexpressed genes
Osteoclast differentiation	22	0.00291408	17.3228	Overexpressed genes
PPAR signaling pathway	12	0.0470713	16.2162	Overexpressed genes
Chronic myeloid leukemia	12	0.0483699	15.7895	Overexpressed genes
SRP-dependent protein targeting to membrane	25	2.94664e-11	27.7778	Underexpressed genes
cotranslational protein targeting to membrane	25	2.96526e-11	26.5957	Underexpressed genes
protein targeting to ER	25	2.15632e-10	24.2718	Underexpressed genes
Catabolism of mRNA	26	2.24555e-10	23.0088	Underexpressed genes
Biosynthesis of peptides	29	6.9039e-09	17.9012	Underexpressed genes
Translation	28	1.64249e-05	13.0841	Underexpressed genes
Positive regulation of T cell activation	12	0.011221	16	Underexpressed genes
Antigen receptor-mediated signaling pathway	20	0.0153165	10.8108	Underexpressed genes
T cell activation	13	0.0174188	14.1304	Underexpressed genes
B cell proliferation	7	0.0437116	21.875	Underexpressed genes
Asthma	8	0.000922713	25.8065	Underexpressed genes
Intestinal immune network for IgA production	11	0.000141942	22.9167	Underexpressed genes
Hematopoietic cell lineage	21	1.08885e-07	21.2121	Underexpressed genes
Allograft rejection	8	0.00310614	21.0526	Underexpressed genes
Graft-versus-host disease	7	0.0257011	16.6667	Underexpressed genes
Type I diabetes mellitus	7	0.0276555	16.2791	Underexpressed genes
Ribosome	25	7.98689e-07	15.8228	Underexpressed genes
Autoimmune thyroid disease	8	0.0252127	15.0943	Underexpressed genes
Th1 and Th2 cell differentiation	13	0.00256106	14.1304	Underexpressed genes
Th17 cell differentiation	15	0.000937435	14.0187	Underexpressed genes
