# Supplementary material for: Study of Progression of COVID-19 in Indian Population based on Transcriptomic Approach
Source: Preprints.org preprint supplement (doi:10.20944/preprints202212.0431.v1), 2022-12-23

**Supplementary 4:** Scale-free topology model showing the association between threshold value (i.e., R²) of the scale-free topology and the soft threshold power (β). The lowest β at which the R² is greater than 0.85 is considered soft power.


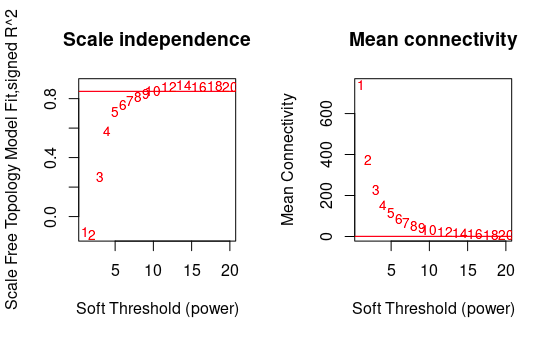

Supplement: Supplementary file 4 [file Supp_4.docx]
