# Supplementary material for: Study of Progression of COVID-19 in Indian Population based on Transcriptomic Approach
Source: Preprints.org preprint supplement (doi:10.20944/preprints202212.0431.v1), 2022-12-23
Supplement: Supplementary file 5 [file Supp_5.xlsx]

## Sheet: union_zsummary
Modules	medianRank.pres	medianRank.qual	Zsummary.pres	Zsummary.qual
black	5	1	11	16
blue	4	3	28	28
brown	3	5	28	28
gold	6	8	20	0.32
green	8	2	7.6	63
grey	9	9	2.2	-8.1
magenta	1	6	14	7.2
pink	7	7	3.2	6.3
purple	2	4	6.9	6.4
