# Supplementary material for: Study of Progression of COVID-19 in Indian Population based on Transcriptomic Approach
Source: Preprints.org preprint supplement (doi:10.20944/preprints202212.0431.v1), 2022-12-23
Supplement: Supplementary file 6 [file Supp_6.xlsx]

## Sheet: Genes_and_modules_Covid_test
Genes	Modules
ENSG00000142583	royalblue
ENSG00000227070	royalblue
ENSG00000158887	royalblue
ENSG00000085840	royalblue
ENSG00000283445	royalblue
ENSG00000189195	royalblue
ENSG00000117399	royalblue
ENSG00000123473	royalblue
ENSG00000264522	royalblue
ENSG00000185499	royalblue
ENSG00000162736	royalblue
ENSG00000144158	royalblue
ENSG00000115109	royalblue
ENSG00000135899	royalblue
ENSG00000059728	royalblue
ENSG00000233762	royalblue
ENSG00000073737	royalblue
ENSG00000234997	royalblue
ENSG00000239941	royalblue
ENSG00000161267	royalblue
ENSG00000198585	royalblue
ENSG00000114450	royalblue
ENSG00000011376	royalblue
ENSG00000163818	royalblue
ENSG00000012223	royalblue
ENSG00000051341	royalblue
ENSG00000073111	royalblue
ENSG00000251593	royalblue
ENSG00000164591	royalblue
ENSG00000050767	royalblue
ENSG00000123545	royalblue
ENSG00000237649	royalblue
ENSG00000158406	royalblue
ENSG00000112592	royalblue
ENSG00000196747	royalblue
ENSG00000233822	royalblue
ENSG00000224940	royalblue
ENSG00000164610	royalblue
ENSG00000230311	royalblue
ENSG00000198759	royalblue
ENSG00000289007	royalblue
ENSG00000090889	royalblue
ENSG00000164821	royalblue
ENSG00000239839	royalblue
ENSG00000174226	royalblue
ENSG00000206047	royalblue
ENSG00000240247	royalblue
ENSG00000251633	royalblue
ENSG00000165304	royalblue
ENSG00000148346	royalblue
ENSG00000287480	royalblue
ENSG00000288838	royalblue
ENSG00000276291	royalblue
ENSG00000172893	royalblue
ENSG00000182048	royalblue
ENSG00000065618	royalblue
ENSG00000188690	royalblue
ENSG00000285884	royalblue
ENSG00000243517	royalblue
ENSG00000139239	royalblue
ENSG00000110799	royalblue
ENSG00000135476	royalblue
ENSG00000122966	royalblue
ENSG00000213995	royalblue
ENSG00000100650	royalblue
ENSG00000213928	royalblue
ENSG00000211966	royalblue
ENSG00000100448	royalblue
ENSG00000125952	royalblue
ENSG00000259070	royalblue
ENSG00000259479	royalblue
ENSG00000156970	royalblue
ENSG00000137812	royalblue
ENSG00000140534	royalblue
ENSG00000261404	royalblue
ENSG00000260495	royalblue
ENSG00000174938	royalblue
ENSG00000108561	royalblue
ENSG00000094804	royalblue
ENSG00000108828	royalblue
ENSG00000082641	royalblue
ENSG00000178999	royalblue
ENSG00000185624	royalblue
ENSG00000253730	royalblue
ENSG00000280022	royalblue
ENSG00000277969	royalblue
ENSG00000273148	royalblue
ENSG00000101425	royalblue
ENSG00000175063	royalblue
ENSG00000160117	royalblue
ENSG00000248385	royalblue
ENSG00000167766	royalblue
ENSG00000172232	royalblue
ENSG00000196415	royalblue
ENSG00000197561	royalblue
ENSG00000075218	royalblue
ENSG00000093009	royalblue
ENSG00000162496	red
ENSG00000121310	red
ENSG00000097033	red
ENSG00000188641	red
ENSG00000116793	red
ENSG00000116824	red
ENSG00000007341	red
ENSG00000117318	red
ENSG00000182749	red
ENSG00000203710	red
ENSG00000181754	red
ENSG00000213062	red
ENSG00000134243	red
ENSG00000196352	red
ENSG00000054523	red
ENSG00000235665	red
ENSG00000237803	red
ENSG00000230773	red
ENSG00000158089	red
ENSG00000236090	red
ENSG00000232125	red
ENSG00000173744	red
ENSG00000184611	red
ENSG00000232973	red
ENSG00000154764	red
ENSG00000093167	red
ENSG00000239797	red
ENSG00000075420	red
ENSG00000051382	red
ENSG00000163958	red
ENSG00000163754	red
ENSG00000181458	red
ENSG00000114735	red
ENSG00000229453	red
ENSG00000183662	red
ENSG00000163697	red
ENSG00000287360	red
ENSG00000164120	red
ENSG00000109321	red
ENSG00000137462	red
ENSG00000163625	red
ENSG00000145332	red
ENSG00000151726	red
ENSG00000163995	red
ENSG00000283314	red
ENSG00000168214	red
ENSG00000145390	red
ENSG00000196782	red
ENSG00000245954	red
ENSG00000133256	red
ENSG00000286577	red
ENSG00000146021	red
ENSG00000113368	red
ENSG00000113742	red
ENSG00000113068	red
ENSG00000153113	red
ENSG00000164172	red
ENSG00000072682	red
ENSG00000145703	red
ENSG00000225940	red
ENSG00000224157	red
ENSG00000111885	red
ENSG00000137393	red
ENSG00000021355	red
ENSG00000112062	red
ENSG00000279942	red
ENSG00000219023	red
ENSG00000112394	red
ENSG00000241644	red
ENSG00000005020	red
ENSG00000235450	red
ENSG00000230927	red
ENSG00000019991	red
ENSG00000232385	red
ENSG00000128513	red
ENSG00000211746	red
ENSG00000276405	red
ENSG00000274752	red
ENSG00000197008	red
ENSG00000232593	red
ENSG00000006757	red
ENSG00000102245	red
ENSG00000120915	red
ENSG00000215114	red
ENSG00000104375	red
ENSG00000136997	red
ENSG00000168615	red
ENSG00000165030	red
ENSG00000165138	red
ENSG00000286834	red
ENSG00000234771	red
ENSG00000227218	red
ENSG00000167106	red
ENSG00000106780	red
ENSG00000256469	red
ENSG00000149582	red
ENSG00000160613	red
ENSG00000133812	red
ENSG00000289150	red
ENSG00000166313	red
ENSG00000152465	red
ENSG00000198060	red
ENSG00000215002	red
ENSG00000220842	red
ENSG00000171862	red
ENSG00000107485	red
ENSG00000107957	red
ENSG00000166523	red
ENSG00000256537	red
ENSG00000111203	red
ENSG00000135426	red
ENSG00000111452	red
ENSG00000151136	red
ENSG00000177675	red
ENSG00000204954	red
ENSG00000135469	red
ENSG00000139132	red
ENSG00000135127	red
ENSG00000185847	red
ENSG00000205822	red
ENSG00000133116	red
ENSG00000275741	red
ENSG00000180776	red
ENSG00000242571	red
ENSG00000088808	red
ENSG00000211858	red
ENSG00000211805	red
ENSG00000259133	red
ENSG00000198604	red
ENSG00000100596	red
ENSG00000247970	red
ENSG00000275325	red
ENSG00000259269	red
ENSG00000069974	red
ENSG00000069869	red
ENSG00000182175	red
ENSG00000140563	red
ENSG00000006007	red
ENSG00000103351	red
ENSG00000220793	red
ENSG00000277481	red
ENSG00000283003	red
ENSG00000108582	red
ENSG00000108984	red
ENSG00000141293	red
ENSG00000161381	red
ENSG00000007237	red
ENSG00000263887	red
ENSG00000271447	red
ENSG00000141194	red
ENSG00000108474	red
ENSG00000263069	red
ENSG00000168461	red
ENSG00000101417	red
ENSG00000124243	red
ENSG00000088899	red
ENSG00000124181	red
ENSG00000235590	red
ENSG00000171105	red
ENSG00000142303	red
ENSG00000129354	red
ENSG00000105088	red
ENSG00000070371	red
ENSG00000099910	red
ENSG00000155307	red
ENSG00000160185	red
ENSG00000142166	red
ENSG00000237945	red
ENSG00000289421	red
ENSG00000225492	paleturquoise
ENSG00000241361	paleturquoise
ENSG00000198929	paleturquoise
ENSG00000183347	paleturquoise
ENSG00000009780	paleturquoise
ENSG00000234518	paleturquoise
ENSG00000137959	paleturquoise
ENSG00000223393	paleturquoise
ENSG00000137965	paleturquoise
ENSG00000186092	paleturquoise
ENSG00000266028	paleturquoise
ENSG00000086015	paleturquoise
ENSG00000132196	paleturquoise
ENSG00000258465	paleturquoise
ENSG00000198369	paleturquoise
ENSG00000196141	paleturquoise
ENSG00000115415	paleturquoise
ENSG00000163170	paleturquoise
ENSG00000115267	paleturquoise
ENSG00000225964	paleturquoise
ENSG00000134321	paleturquoise
ENSG00000134326	paleturquoise
ENSG00000170293	paleturquoise
ENSG00000173193	paleturquoise
ENSG00000163630	paleturquoise
ENSG00000121797	paleturquoise
ENSG00000114861	paleturquoise
ENSG00000075651	paleturquoise
ENSG00000244119	paleturquoise
ENSG00000164100	paleturquoise
ENSG00000138646	paleturquoise
ENSG00000137628	paleturquoise
ENSG00000249631	paleturquoise
ENSG00000249203	paleturquoise
ENSG00000145685	paleturquoise
ENSG00000185056	paleturquoise
ENSG00000250222	paleturquoise
ENSG00000237499	paleturquoise
ENSG00000197153	paleturquoise
ENSG00000177409	paleturquoise
ENSG00000241127	paleturquoise
ENSG00000224116	paleturquoise
ENSG00000170965	paleturquoise
ENSG00000253377	paleturquoise
ENSG00000104660	paleturquoise
ENSG00000253471	paleturquoise
ENSG00000135052	paleturquoise
ENSG00000234680	paleturquoise
ENSG00000278175	paleturquoise
ENSG00000204971	paleturquoise
ENSG00000132256	paleturquoise
ENSG00000286369	paleturquoise
ENSG00000256751	paleturquoise
ENSG00000188393	paleturquoise
ENSG00000223914	paleturquoise
ENSG00000152767	paleturquoise
ENSG00000133106	paleturquoise
ENSG00000258955	paleturquoise
ENSG00000259660	paleturquoise
ENSG00000166821	paleturquoise
ENSG00000270127	paleturquoise
ENSG00000259205	paleturquoise
ENSG00000266786	paleturquoise
ENSG00000132530	paleturquoise
ENSG00000264701	paleturquoise
ENSG00000132470	paleturquoise
ENSG00000197063	paleturquoise
ENSG00000005882	paleturquoise
ENSG00000141664	paleturquoise
ENSG00000230133	paleturquoise
ENSG00000203999	paleturquoise
ENSG00000197933	paleturquoise
ENSG00000267241	paleturquoise
ENSG00000130164	paleturquoise
ENSG00000126583	paleturquoise
ENSG00000176695	paleturquoise
ENSG00000186951	paleturquoise
ENSG00000288811	paleturquoise
ENSG00000158006	orangered4
ENSG00000116675	orangered4
ENSG00000272583	orangered4
ENSG00000197721	orangered4
ENSG00000185630	orangered4
ENSG00000158859	orangered4
ENSG00000234571	orangered4
ENSG00000162873	orangered4
ENSG00000180437	orangered4
ENSG00000143479	orangered4
ENSG00000219481	orangered4
ENSG00000163251	orangered4
ENSG00000259956	orangered4
ENSG00000224187	orangered4
ENSG00000250501	orangered4
ENSG00000145623	orangered4
ENSG00000286809	orangered4
ENSG00000081791	orangered4
ENSG00000244073	orangered4
ENSG00000217027	orangered4
ENSG00000229596	orangered4
ENSG00000124557	orangered4
ENSG00000112077	orangered4
ENSG00000234147	orangered4
ENSG00000172331	orangered4
ENSG00000165171	orangered4
ENSG00000287860	orangered4
ENSG00000287166	orangered4
ENSG00000104267	orangered4
ENSG00000133742	orangered4
ENSG00000170289	orangered4
ENSG00000253154	orangered4
ENSG00000285082	orangered4
ENSG00000255468	orangered4
ENSG00000110693	orangered4
ENSG00000280012	orangered4
ENSG00000234589	orangered4
ENSG00000196091	orangered4
ENSG00000057294	orangered4
ENSG00000211949	orangered4
ENSG00000259717	orangered4
ENSG00000070182	orangered4
ENSG00000259182	orangered4
ENSG00000197978	orangered4
ENSG00000261427	orangered4
ENSG00000103005	orangered4
ENSG00000274460	orangered4
ENSG00000155666	orangered4
ENSG00000223959	orangered4
ENSG00000167858	orangered4
ENSG00000183691	orangered4
ENSG00000267109	orangered4
ENSG00000171574	orangered4
ENSG00000198464	orangered4
ENSG00000187902	orangered4
ENSG00000289120	orangered4
ENSG00000116663	orange
ENSG00000188786	orange
ENSG00000175984	orange
ENSG00000229258	orange
ENSG00000116983	orange
ENSG00000286231	orange
ENSG00000187608	orange
ENSG00000173212	orange
ENSG00000131779	orange
ENSG00000004455	orange
ENSG00000143891	orange
ENSG00000228876	orange
ENSG00000115425	orange
ENSG00000183281	orange
ENSG00000185909	orange
ENSG00000247624	orange
ENSG00000162840	orange
ENSG00000246526	orange
ENSG00000145384	orange
ENSG00000152932	orange
ENSG00000053108	orange
ENSG00000184188	orange
ENSG00000168916	orange
ENSG00000235122	orange
ENSG00000260212	orange
ENSG00000010030	orange
ENSG00000234515	orange
ENSG00000251578	orange
ENSG00000122642	orange
ENSG00000169871	orange
ENSG00000232818	orange
ENSG00000222011	orange
ENSG00000253250	orange
ENSG00000178685	orange
ENSG00000044459	orange
ENSG00000120156	orange
ENSG00000132109	orange
ENSG00000156587	orange
ENSG00000234756	orange
ENSG00000233321	orange
ENSG00000287124	orange
ENSG00000070018	orange
ENSG00000111110	orange
ENSG00000235872	orange
ENSG00000257657	orange
ENSG00000120868	orange
ENSG00000135148	orange
ENSG00000165682	orange
ENSG00000225231	orange
ENSG00000256128	orange
ENSG00000182796	orange
ENSG00000270008	orange
ENSG00000150403	orange
ENSG00000259719	orange
ENSG00000282651	orange
ENSG00000260285	orange
ENSG00000100897	orange
ENSG00000289137	orange
ENSG00000114062	orange
ENSG00000125148	orange
ENSG00000162086	orange
ENSG00000168961	orange
ENSG00000068079	orange
ENSG00000129673	orange
ENSG00000141497	orange
ENSG00000108771	orange
ENSG00000081913	orange
ENSG00000266908	orange
ENSG00000125826	orange
ENSG00000132669	orange
ENSG00000124256	orange
ENSG00000228340	orange
ENSG00000130589	orange
ENSG00000267881	orange
ENSG00000104805	orange
ENSG00000118162	orange
ENSG00000105402	orange
ENSG00000289246	orange
ENSG00000284194	orange
ENSG00000274422	orange
ENSG00000128335	orange
ENSG00000100342	orange
ENSG00000229608	orange
Genes	Modules
ENSG00000116786	lightyellow
ENSG00000142599	lightyellow
ENSG00000142687	lightyellow
ENSG00000172380	lightyellow
ENSG00000143786	lightyellow
ENSG00000162889	lightyellow
ENSG00000117713	lightyellow
ENSG00000143379	lightyellow
ENSG00000225938	lightyellow
ENSG00000224167	lightyellow
ENSG00000171863	lightyellow
ENSG00000168918	lightyellow
ENSG00000152253	lightyellow
ENSG00000138382	lightyellow
ENSG00000143977	lightyellow
ENSG00000138430	lightyellow
ENSG00000187514	lightyellow
ENSG00000228329	lightyellow
ENSG00000218175	lightyellow
ENSG00000198522	lightyellow
ENSG00000242908	lightyellow
ENSG00000136522	lightyellow
ENSG00000114656	lightyellow
ENSG00000171476	lightyellow
ENSG00000198856	lightyellow
ENSG00000059691	lightyellow
ENSG00000145425	lightyellow
ENSG00000109814	lightyellow
ENSG00000163682	lightyellow
ENSG00000289320	lightyellow
ENSG00000250182	lightyellow
ENSG00000113272	lightyellow
ENSG00000169567	lightyellow
ENSG00000188002	lightyellow
ENSG00000214784	lightyellow
ENSG00000072571	lightyellow
ENSG00000013392	lightyellow
ENSG00000155111	lightyellow
ENSG00000235663	lightyellow
ENSG00000204396	lightyellow
ENSG00000283117	lightyellow
ENSG00000122547	lightyellow
ENSG00000234185	lightyellow
ENSG00000265479	lightyellow
ENSG00000225573	lightyellow
ENSG00000106591	lightyellow
ENSG00000171130	lightyellow
ENSG00000182095	lightyellow
ENSG00000237311	lightyellow
ENSG00000237506	lightyellow
ENSG00000172465	lightyellow
ENSG00000130119	lightyellow
ENSG00000156675	lightyellow
ENSG00000253819	lightyellow
ENSG00000104408	lightyellow
ENSG00000170631	lightyellow
ENSG00000148411	lightyellow
ENSG00000149516	lightyellow
ENSG00000150776	lightyellow
ENSG00000148841	lightyellow
ENSG00000236552	lightyellow
ENSG00000171206	lightyellow
ENSG00000173391	lightyellow
ENSG00000166987	lightyellow
ENSG00000061794	lightyellow
ENSG00000076108	lightyellow
ENSG00000089157	lightyellow
ENSG00000257433	lightyellow
ENSG00000122034	lightyellow
ENSG00000240914	lightyellow
ENSG00000179361	lightyellow
ENSG00000140632	lightyellow
ENSG00000005339	lightyellow
ENSG00000198373	lightyellow
ENSG00000118898	lightyellow
ENSG00000153815	lightyellow
ENSG00000197943	lightyellow
ENSG00000004660	lightyellow
ENSG00000002834	lightyellow
ENSG00000129657	lightyellow
ENSG00000181222	lightyellow
ENSG00000033627	lightyellow
ENSG00000141337	lightyellow
ENSG00000141404	lightyellow
ENSG00000225419	lightyellow
ENSG00000158480	lightyellow
ENSG00000101104	lightyellow
ENSG00000124126	lightyellow
ENSG00000224397	lightyellow
ENSG00000127663	lightyellow
ENSG00000258873	lightyellow
ENSG00000088038	lightyellow
ENSG00000167491	lightyellow
ENSG00000099308	lightyellow
ENSG00000105352	lightyellow
ENSG00000105514	lightyellow
ENSG00000105656	lightyellow
ENSG00000100084	lightyellow
ENSG00000099995	lightyellow
ENSG00000225643	lightsteelblue1
ENSG00000196449	lightsteelblue1
ENSG00000137936	lightsteelblue1
ENSG00000225079	lightsteelblue1
ENSG00000227740	lightsteelblue1
ENSG00000162782	lightsteelblue1
ENSG00000279838	lightsteelblue1
ENSG00000174175	lightsteelblue1
ENSG00000228309	lightsteelblue1
ENSG00000198890	lightsteelblue1
ENSG00000143452	lightsteelblue1
ENSG00000134183	lightsteelblue1
ENSG00000287064	lightsteelblue1
ENSG00000289549	lightsteelblue1
ENSG00000271567	lightsteelblue1
ENSG00000279782	lightsteelblue1
ENSG00000162641	lightsteelblue1
ENSG00000232628	lightsteelblue1
ENSG00000239636	lightsteelblue1
ENSG00000249087	lightsteelblue1
ENSG00000233431	lightsteelblue1
ENSG00000049323	lightsteelblue1
ENSG00000116005	lightsteelblue1
ENSG00000171103	lightsteelblue1
ENSG00000270210	lightsteelblue1
ENSG00000184492	lightsteelblue1
ENSG00000248672	lightsteelblue1
ENSG00000237772	lightsteelblue1
ENSG00000079156	lightsteelblue1
ENSG00000162976	lightsteelblue1
ENSG00000204634	lightsteelblue1
ENSG00000169967	lightsteelblue1
ENSG00000115738	lightsteelblue1
ENSG00000144130	lightsteelblue1
ENSG00000226266	lightsteelblue1
ENSG00000288819	lightsteelblue1
ENSG00000239440	lightsteelblue1
ENSG00000183813	lightsteelblue1
ENSG00000144824	lightsteelblue1
ENSG00000286003	lightsteelblue1
ENSG00000227337	lightsteelblue1
ENSG00000188315	lightsteelblue1
ENSG00000230530	lightsteelblue1
ENSG00000172765	lightsteelblue1
ENSG00000180353	lightsteelblue1
ENSG00000065534	lightsteelblue1
ENSG00000197548	lightsteelblue1
ENSG00000289519	lightsteelblue1
ENSG00000174227	lightsteelblue1
ENSG00000163694	lightsteelblue1
ENSG00000138722	lightsteelblue1
ENSG00000282278	lightsteelblue1
ENSG00000138798	lightsteelblue1
ENSG00000185477	lightsteelblue1
ENSG00000183439	lightsteelblue1
ENSG00000151014	lightsteelblue1
ENSG00000163104	lightsteelblue1
ENSG00000065882	lightsteelblue1
ENSG00000249348	lightsteelblue1
ENSG00000286388	lightsteelblue1
ENSG00000244361	lightsteelblue1
ENSG00000164181	lightsteelblue1
ENSG00000152380	lightsteelblue1
ENSG00000248296	lightsteelblue1
ENSG00000253311	lightsteelblue1
ENSG00000145882	lightsteelblue1
ENSG00000248996	lightsteelblue1
ENSG00000170231	lightsteelblue1
ENSG00000253736	lightsteelblue1
ENSG00000248559	lightsteelblue1
ENSG00000283408	lightsteelblue1
ENSG00000229313	lightsteelblue1
ENSG00000282804	lightsteelblue1
ENSG00000218713	lightsteelblue1
ENSG00000154548	lightsteelblue1
ENSG00000286533	lightsteelblue1
ENSG00000071994	lightsteelblue1
ENSG00000112304	lightsteelblue1
ENSG00000137218	lightsteelblue1
ENSG00000175003	lightsteelblue1
ENSG00000137261	lightsteelblue1
ENSG00000274641	lightsteelblue1
ENSG00000179165	lightsteelblue1
ENSG00000233452	lightsteelblue1
ENSG00000280828	lightsteelblue1
ENSG00000175600	lightsteelblue1
ENSG00000185955	lightsteelblue1
ENSG00000106477	lightsteelblue1
ENSG00000286830	lightsteelblue1
ENSG00000271344	lightsteelblue1
ENSG00000257923	lightsteelblue1
ENSG00000228113	lightsteelblue1
ENSG00000135250	lightsteelblue1
ENSG00000214870	lightsteelblue1
ENSG00000169084	lightsteelblue1
ENSG00000231772	lightsteelblue1
ENSG00000204272	lightsteelblue1
ENSG00000147010	lightsteelblue1
ENSG00000000003	lightsteelblue1
ENSG00000147138	lightsteelblue1
ENSG00000186787	lightsteelblue1
ENSG00000233093	lightsteelblue1
ENSG00000258677	lightsteelblue1
ENSG00000275103	lightsteelblue1
ENSG00000288602	lightsteelblue1
ENSG00000197140	lightsteelblue1
ENSG00000167912	lightsteelblue1
ENSG00000168672	lightsteelblue1
ENSG00000148200	lightsteelblue1
ENSG00000136816	lightsteelblue1
ENSG00000229314	lightsteelblue1
ENSG00000134812	lightsteelblue1
ENSG00000132749	lightsteelblue1
ENSG00000109943	lightsteelblue1
ENSG00000286044	lightsteelblue1
ENSG00000285693	lightsteelblue1
ENSG00000255823	lightsteelblue1
ENSG00000255557	lightsteelblue1
ENSG00000129744	lightsteelblue1
ENSG00000188211	lightsteelblue1
ENSG00000186714	lightsteelblue1
ENSG00000150433	lightsteelblue1
ENSG00000255197	lightsteelblue1
ENSG00000269609	lightsteelblue1
ENSG00000165983	lightsteelblue1
ENSG00000178217	lightsteelblue1
ENSG00000285737	lightsteelblue1
ENSG00000183049	lightsteelblue1
ENSG00000107679	lightsteelblue1
ENSG00000250959	lightsteelblue1
ENSG00000232807	lightsteelblue1
ENSG00000139160	lightsteelblue1
ENSG00000276136	lightsteelblue1
ENSG00000258048	lightsteelblue1
ENSG00000188596	lightsteelblue1
ENSG00000276900	lightsteelblue1
ENSG00000196668	lightsteelblue1
ENSG00000151948	lightsteelblue1
ENSG00000130783	lightsteelblue1
ENSG00000288665	lightsteelblue1
ENSG00000151164	lightsteelblue1
ENSG00000275963	lightsteelblue1
ENSG00000167553	lightsteelblue1
ENSG00000179912	lightsteelblue1
ENSG00000226240	lightsteelblue1
ENSG00000123179	lightsteelblue1
ENSG00000259072	lightsteelblue1
ENSG00000170054	lightsteelblue1
ENSG00000125954	lightsteelblue1
ENSG00000197555	lightsteelblue1
ENSG00000273729	lightsteelblue1
ENSG00000140022	lightsteelblue1
ENSG00000137801	lightsteelblue1
ENSG00000092531	lightsteelblue1
ENSG00000140367	lightsteelblue1
ENSG00000259240	lightsteelblue1
ENSG00000283597	lightsteelblue1
ENSG00000170236	lightsteelblue1
ENSG00000168806	lightsteelblue1
ENSG00000166503	lightsteelblue1
ENSG00000166147	lightsteelblue1
ENSG00000183060	lightsteelblue1
ENSG00000169181	lightsteelblue1
ENSG00000268754	lightsteelblue1
ENSG00000010539	lightsteelblue1
ENSG00000169951	lightsteelblue1
ENSG00000183044	lightsteelblue1
ENSG00000166501	lightsteelblue1
ENSG00000140743	lightsteelblue1
ENSG00000260086	lightsteelblue1
ENSG00000262136	lightsteelblue1
ENSG00000132359	lightsteelblue1
ENSG00000171475	lightsteelblue1
ENSG00000108306	lightsteelblue1
ENSG00000264058	lightsteelblue1
ENSG00000108423	lightsteelblue1
ENSG00000167434	lightsteelblue1
ENSG00000065325	lightsteelblue1
ENSG00000109047	lightsteelblue1
ENSG00000274341	lightsteelblue1
ENSG00000279762	lightsteelblue1
ENSG00000141376	lightsteelblue1
ENSG00000173917	lightsteelblue1
ENSG00000234477	lightsteelblue1
ENSG00000141506	lightsteelblue1
ENSG00000242660	lightsteelblue1
ENSG00000264538	lightsteelblue1
ENSG00000101638	lightsteelblue1
ENSG00000266049	lightsteelblue1
ENSG00000267390	lightsteelblue1
ENSG00000235820	lightsteelblue1
ENSG00000259723	lightsteelblue1
ENSG00000101000	lightsteelblue1
ENSG00000230753	lightsteelblue1
ENSG00000101188	lightsteelblue1
ENSG00000125779	lightsteelblue1
ENSG00000205181	lightsteelblue1
ENSG00000175691	lightsteelblue1
ENSG00000131116	lightsteelblue1
ENSG00000268833	lightsteelblue1
ENSG00000269119	lightsteelblue1
ENSG00000273111	lightsteelblue1
ENSG00000167634	lightsteelblue1
ENSG00000267649	lightsteelblue1
ENSG00000268750	lightsteelblue1
ENSG00000255730	lightsteelblue1
ENSG00000267385	lightsteelblue1
ENSG00000269877	lightsteelblue1
ENSG00000199143	lightsteelblue1
ENSG00000142405	lightsteelblue1
ENSG00000132003	lightsteelblue1
ENSG00000130513	lightsteelblue1
ENSG00000268199	lightsteelblue1
ENSG00000266983	lightsteelblue1
ENSG00000283900	lightsteelblue1
ENSG00000232346	lightsteelblue1
ENSG00000100266	lightsteelblue1
ENSG00000100109	lightsteelblue1
ENSG00000178803	lightsteelblue1
ENSG00000100024	lightsteelblue1
ENSG00000286127	lightsteelblue1
ENSG00000100218	lightsteelblue1
ENSG00000142192	lightsteelblue1
ENSG00000214867	lightsteelblue1
ENSG00000157978	lightcyan
ENSG00000169991	lightcyan
ENSG00000143199	lightcyan
ENSG00000287856	lightcyan
ENSG00000213085	lightcyan
ENSG00000120942	lightcyan
ENSG00000237950	lightcyan
ENSG00000159445	lightcyan
ENSG00000185436	lightcyan
ENSG00000117090	lightcyan
ENSG00000078618	lightcyan
ENSG00000237938	lightcyan
ENSG00000116990	lightcyan
ENSG00000143515	lightcyan
ENSG00000189362	lightcyan
ENSG00000152056	lightcyan
ENSG00000067066	lightcyan
ENSG00000286707	lightcyan
ENSG00000230979	lightcyan
ENSG00000116044	lightcyan
ENSG00000225328	lightcyan
ENSG00000119771	lightcyan
ENSG00000233426	lightcyan
ENSG00000113966	lightcyan
ENSG00000132394	lightcyan
ENSG00000131373	lightcyan
ENSG00000288703	lightcyan
ENSG00000132182	lightcyan
ENSG00000248373	lightcyan
ENSG00000248242	lightcyan
ENSG00000180769	lightcyan
ENSG00000179299	lightcyan
ENSG00000287226	lightcyan
ENSG00000109339	lightcyan
ENSG00000286256	lightcyan
ENSG00000109272	lightcyan
ENSG00000249069	lightcyan
ENSG00000145649	lightcyan
ENSG00000251293	lightcyan
ENSG00000250346	lightcyan
ENSG00000242477	lightcyan
ENSG00000247679	lightcyan
ENSG00000082074	lightcyan
ENSG00000028310	lightcyan
ENSG00000175471	lightcyan
ENSG00000113048	lightcyan
ENSG00000223786	lightcyan
ENSG00000287080	lightcyan
ENSG00000261211	lightcyan
ENSG00000137337	lightcyan
ENSG00000272168	lightcyan
ENSG00000204946	lightcyan
ENSG00000166526	lightcyan
ENSG00000091136	lightcyan
ENSG00000176410	lightcyan
ENSG00000282780	lightcyan
ENSG00000166529	lightcyan
ENSG00000257743	lightcyan
ENSG00000225981	lightcyan
ENSG00000204904	lightcyan
ENSG00000129682	lightcyan
ENSG00000189369	lightcyan
ENSG00000130830	lightcyan
ENSG00000226530	lightcyan
ENSG00000120509	lightcyan
ENSG00000287476	lightcyan
ENSG00000104228	lightcyan
ENSG00000175445	lightcyan
ENSG00000253983	lightcyan
ENSG00000182307	lightcyan
ENSG00000154589	lightcyan
ENSG00000251396	lightcyan
ENSG00000086102	lightcyan
ENSG00000283541	lightcyan
ENSG00000275649	lightcyan
ENSG00000276386	lightcyan
ENSG00000137054	lightcyan
ENSG00000276422	lightcyan
ENSG00000157303	lightcyan
ENSG00000235106	lightcyan
ENSG00000154529	lightcyan
ENSG00000288234	lightcyan
ENSG00000224038	lightcyan
ENSG00000272896	lightcyan
ENSG00000165185	lightcyan
ENSG00000277350	lightcyan
ENSG00000106714	lightcyan
ENSG00000289440	lightcyan
ENSG00000110031	lightcyan
ENSG00000278376	lightcyan
ENSG00000110324	lightcyan
ENSG00000289568	lightcyan
ENSG00000184669	lightcyan
ENSG00000203496	lightcyan
ENSG00000148795	lightcyan
ENSG00000120051	lightcyan
ENSG00000283141	lightcyan
ENSG00000023839	lightcyan
ENSG00000204021	lightcyan
ENSG00000148606	lightcyan
ENSG00000150048	lightcyan
ENSG00000011105	lightcyan
ENSG00000286402	lightcyan
ENSG00000111058	lightcyan
ENSG00000089220	lightcyan
ENSG00000245105	lightcyan
ENSG00000235162	lightcyan
ENSG00000111412	lightcyan
ENSG00000090376	lightcyan
ENSG00000111052	lightcyan
ENSG00000286279	lightcyan
ENSG00000283361	lightcyan
ENSG00000283384	lightcyan
ENSG00000258731	lightcyan
ENSG00000258711	lightcyan
ENSG00000100767	lightcyan
ENSG00000100814	lightcyan
ENSG00000075413	lightcyan
ENSG00000211787	lightcyan
ENSG00000133980	lightcyan
ENSG00000165555	lightcyan
ENSG00000166734	lightcyan
ENSG00000225151	lightcyan
ENSG00000171766	lightcyan
ENSG00000103710	lightcyan
ENSG00000229389	lightcyan
ENSG00000260058	lightcyan
ENSG00000261239	lightcyan
ENSG00000103365	lightcyan
ENSG00000179965	lightcyan
ENSG00000266563	lightcyan
ENSG00000274211	lightcyan
ENSG00000227517	lightcyan
ENSG00000133030	lightcyan
ENSG00000167720	lightcyan
ENSG00000126858	lightcyan
ENSG00000121060	lightcyan
ENSG00000279332	lightcyan
ENSG00000197296	lightcyan
ENSG00000124160	lightcyan
ENSG00000213820	lightcyan
ENSG00000149474	lightcyan
ENSG00000101464	lightcyan
ENSG00000065717	lightcyan
ENSG00000064607	lightcyan
ENSG00000181035	lightcyan
ENSG00000204653	lightcyan
ENSG00000178464	lightcyan
ENSG00000269564	lightcyan
ENSG00000153885	lightcyan
ENSG00000269637	lightcyan
ENSG00000066044	lightcyan
ENSG00000183647	lightcyan
ENSG00000185252	lightcyan
ENSG00000100129	lightcyan
ENSG00000205643	lightcyan
ENSG00000141956	lightcyan
ENSG00000160221	lightcyan
ENSG00000156299	lightcyan
ENSG00000210140	lightcyan
ENSG00000184005	ivory
ENSG00000143185	ivory
ENSG00000121454	ivory
ENSG00000143184	ivory
ENSG00000123836	ivory
ENSG00000117834	ivory
ENSG00000116991	ivory
ENSG00000182901	ivory
ENSG00000084070	ivory
ENSG00000203739	ivory
ENSG00000288982	ivory
ENSG00000160856	ivory
ENSG00000162949	ivory
ENSG00000075426	ivory
ENSG00000287771	ivory
ENSG00000224099	ivory
ENSG00000138378	ivory
ENSG00000115594	ivory
ENSG00000115604	ivory
ENSG00000182600	ivory
ENSG00000119862	ivory
ENSG00000203645	ivory
ENSG00000181847	ivory
ENSG00000237990	ivory
ENSG00000138639	ivory
ENSG00000145428	ivory
ENSG00000109466	ivory
ENSG00000164106	ivory
ENSG00000289197	ivory
ENSG00000226926	ivory
ENSG00000181751	ivory
ENSG00000248555	ivory
ENSG00000113763	ivory
ENSG00000113073	ivory
ENSG00000079215	ivory
ENSG00000085231	ivory
ENSG00000113749	ivory
ENSG00000261584	ivory
ENSG00000146122	ivory
ENSG00000096060	ivory
ENSG00000204287	ivory
ENSG00000223865	ivory
ENSG00000204789	ivory
ENSG00000232909	ivory
ENSG00000157343	ivory
ENSG00000106070	ivory
ENSG00000128581	ivory
ENSG00000169902	ivory
ENSG00000275743	ivory
ENSG00000243797	ivory
ENSG00000211753	ivory
ENSG00000232869	ivory
ENSG00000122786	ivory
ENSG00000257335	ivory
ENSG00000064419	ivory
ENSG00000158560	ivory
ENSG00000289108	ivory
ENSG00000179406	ivory
ENSG00000286456	ivory
ENSG00000011201	ivory
ENSG00000155659	ivory
ENSG00000281566	ivory
ENSG00000049769	ivory
ENSG00000125354	ivory
ENSG00000130234	ivory
ENSG00000189221	ivory
ENSG00000101846	ivory
ENSG00000258545	ivory
ENSG00000175806	ivory
ENSG00000164808	ivory
ENSG00000198363	ivory
ENSG00000248858	ivory
ENSG00000042832	ivory
ENSG00000205293	ivory
ENSG00000198169	ivory
ENSG00000130956	ivory
ENSG00000204054	ivory
ENSG00000254695	ivory
ENSG00000255171	ivory
ENSG00000109906	ivory
ENSG00000149483	ivory
ENSG00000250303	ivory
ENSG00000255248	ivory
ENSG00000280953	ivory
ENSG00000223820	ivory
ENSG00000169826	ivory
ENSG00000111261	ivory
ENSG00000175727	ivory
ENSG00000084112	ivory
ENSG00000258921	ivory
ENSG00000111728	ivory
ENSG00000288729	ivory
ENSG00000196935	ivory
ENSG00000185950	ivory
ENSG00000122025	ivory
ENSG00000102780	ivory
ENSG00000150457	ivory
ENSG00000152207	ivory
ENSG00000100731	ivory
ENSG00000258859	ivory
ENSG00000258658	ivory
ENSG00000119650	ivory
ENSG00000100906	ivory
ENSG00000128918	ivory
ENSG00000196547	ivory
ENSG00000259772	ivory
ENSG00000103056	ivory
ENSG00000167207	ivory
ENSG00000274736	ivory
ENSG00000266088	ivory
ENSG00000087157	ivory
ENSG00000132518	ivory
ENSG00000179593	ivory
ENSG00000179094	ivory
ENSG00000161921	ivory
ENSG00000125319	ivory
ENSG00000287737	ivory
ENSG00000270112	ivory
ENSG00000286800	ivory
ENSG00000178342	ivory
ENSG00000234241	ivory
ENSG00000158470	ivory
ENSG00000188559	ivory
ENSG00000268758	ivory
ENSG00000127507	ivory
ENSG00000268186	ivory
ENSG00000268533	ivory
ENSG00000181007	ivory
ENSG00000168661	ivory
ENSG00000130433	ivory
ENSG00000181894	ivory
ENSG00000267339	ivory
ENSG00000100196	ivory
ENSG00000100336	ivory
ENSG00000230138	grey
ENSG00000117519	grey
ENSG00000248605	grey
ENSG00000205126	grey
ENSG00000258344	grey
ENSG00000233780	grey
ENSG00000137819	grey
ENSG00000242692	grey
ENSG00000152240	grey
ENSG00000026559	grey
ENSG00000221923	grey
ENSG00000280383	grey
ENSG00000037637	greenyellow
ENSG00000162511	greenyellow
ENSG00000130766	greenyellow
ENSG00000169403	greenyellow
ENSG00000117676	greenyellow
ENSG00000028137	greenyellow
ENSG00000132906	greenyellow
ENSG00000159339	greenyellow
ENSG00000242267	greenyellow
ENSG00000077549	greenyellow
ENSG00000162433	greenyellow
ENSG00000125703	greenyellow
ENSG00000170989	greenyellow
ENSG00000079739	greenyellow
ENSG00000224445	greenyellow
ENSG00000198799	greenyellow
ENSG00000163393	greenyellow
ENSG00000163156	greenyellow
ENSG00000143624	greenyellow
ENSG00000143643	greenyellow
ENSG00000168118	greenyellow
ENSG00000152382	greenyellow
ENSG00000261024	greenyellow
ENSG00000143845	greenyellow
ENSG00000185220	greenyellow
ENSG00000175137	greenyellow
ENSG00000069275	greenyellow
ENSG00000163874	greenyellow
ENSG00000158825	greenyellow
ENSG00000163399	greenyellow
ENSG00000236675	greenyellow
ENSG00000177628	greenyellow
ENSG00000198952	greenyellow
ENSG00000159352	greenyellow
ENSG00000158710	greenyellow
ENSG00000285646	greenyellow
ENSG00000116685	greenyellow
ENSG00000083444	greenyellow
ENSG00000116691	greenyellow
ENSG00000158874	greenyellow
ENSG00000049089	greenyellow
ENSG00000154309	greenyellow
ENSG00000160781	greenyellow
ENSG00000116396	greenyellow
ENSG00000117410	greenyellow
ENSG00000078369	greenyellow
ENSG00000142669	greenyellow
ENSG00000237101	greenyellow
ENSG00000237781	greenyellow
ENSG00000143761	greenyellow
ENSG00000280157	greenyellow
ENSG00000001460	greenyellow
ENSG00000225750	greenyellow
ENSG00000136630	greenyellow
ENSG00000158769	greenyellow
ENSG00000158773	greenyellow
ENSG00000116514	greenyellow
ENSG00000000938	greenyellow
ENSG00000223356	greenyellow
ENSG00000143303	greenyellow
ENSG00000184260	greenyellow
ENSG00000116984	greenyellow
ENSG00000198400	greenyellow
ENSG00000143382	greenyellow
ENSG00000162775	greenyellow
ENSG00000143862	greenyellow
ENSG00000142634	greenyellow
ENSG00000162438	greenyellow
ENSG00000235749	greenyellow
ENSG00000268903	greenyellow
ENSG00000163554	greenyellow
ENSG00000229051	greenyellow
ENSG00000235079	greenyellow
ENSG00000163141	greenyellow
ENSG00000160785	greenyellow
ENSG00000196418	greenyellow
ENSG00000116871	greenyellow
ENSG00000197956	greenyellow
ENSG00000196182	greenyellow
ENSG00000160685	greenyellow
ENSG00000163191	greenyellow
ENSG00000204160	greenyellow
ENSG00000168148	greenyellow
ENSG00000203852	greenyellow
ENSG00000288859	greenyellow
ENSG00000288825	greenyellow
ENSG00000203811	greenyellow
ENSG00000179862	greenyellow
ENSG00000143776	greenyellow
ENSG00000198734	greenyellow
ENSG00000162413	greenyellow
ENSG00000143373	greenyellow
ENSG00000177674	greenyellow
ENSG00000116754	greenyellow
ENSG00000288573	greenyellow
ENSG00000234807	greenyellow
ENSG00000160766	greenyellow
ENSG00000233621	greenyellow
ENSG00000123472	greenyellow
ENSG00000010803	greenyellow
ENSG00000159189	greenyellow
ENSG00000173369	greenyellow
ENSG00000171786	greenyellow
ENSG00000234425	greenyellow
ENSG00000116584	greenyellow
ENSG00000118960	greenyellow
ENSG00000213626	greenyellow
ENSG00000119866	greenyellow
ENSG00000172116	greenyellow
ENSG00000115306	greenyellow
ENSG00000237992	greenyellow
ENSG00000171094	greenyellow
ENSG00000169621	greenyellow
ENSG00000071073	greenyellow
ENSG00000088179	greenyellow
ENSG00000163002	greenyellow
ENSG00000153107	greenyellow
ENSG00000232023	greenyellow
ENSG00000196950	greenyellow
ENSG00000177855	greenyellow
ENSG00000163811	greenyellow
ENSG00000115828	greenyellow
ENSG00000254126	greenyellow
ENSG00000040933	greenyellow
ENSG00000135956	greenyellow
ENSG00000115504	greenyellow
ENSG00000163001	greenyellow
ENSG00000115756	greenyellow
ENSG00000162980	greenyellow
ENSG00000115155	greenyellow
ENSG00000196843	greenyellow
ENSG00000204843	greenyellow
ENSG00000163596	greenyellow
ENSG00000240344	greenyellow
ENSG00000273975	greenyellow
ENSG00000115827	greenyellow
ENSG00000127824	greenyellow
ENSG00000138381	greenyellow
ENSG00000128699	greenyellow
ENSG00000272754	greenyellow
ENSG00000230876	greenyellow
ENSG00000135976	greenyellow
ENSG00000169994	greenyellow
ENSG00000196912	greenyellow
ENSG00000232931	greenyellow
ENSG00000163464	greenyellow
ENSG00000224159	greenyellow
ENSG00000168878	greenyellow
ENSG00000082438	greenyellow
ENSG00000205054	greenyellow
ENSG00000143429	greenyellow
ENSG00000231584	greenyellow
ENSG00000124357	greenyellow
ENSG00000162881	greenyellow
ENSG00000233128	greenyellow
ENSG00000115317	greenyellow
ENSG00000115325	greenyellow
ENSG00000182533	greenyellow
ENSG00000272282	greenyellow
ENSG00000151789	greenyellow
ENSG00000187118	greenyellow
ENSG00000227339	greenyellow
ENSG00000144655	greenyellow
ENSG00000224094	greenyellow
ENSG00000114353	greenyellow
ENSG00000114378	greenyellow
ENSG00000239572	greenyellow
ENSG00000168309	greenyellow
ENSG00000269028	greenyellow
ENSG00000239388	greenyellow
ENSG00000080822	greenyellow
ENSG00000206527	greenyellow
ENSG00000240891	greenyellow
ENSG00000114107	greenyellow
ENSG00000181804	greenyellow
ENSG00000114120	greenyellow
ENSG00000197415	greenyellow
ENSG00000240033	greenyellow
ENSG00000240875	greenyellow
ENSG00000243861	greenyellow
ENSG00000205835	greenyellow
ENSG00000175166	greenyellow
ENSG00000060971	greenyellow
ENSG00000180376	greenyellow
ENSG00000172340	greenyellow
ENSG00000163785	greenyellow
ENSG00000175455	greenyellow
ENSG00000156976	greenyellow
ENSG00000163536	greenyellow
ENSG00000279320	greenyellow
ENSG00000023330	greenyellow
ENSG00000154917	greenyellow
ENSG00000007402	greenyellow
ENSG00000183873	greenyellow
ENSG00000196549	greenyellow
ENSG00000184500	greenyellow
ENSG00000178700	greenyellow
ENSG00000206562	greenyellow
ENSG00000172667	greenyellow
ENSG00000179097	greenyellow
ENSG00000163932	greenyellow
ENSG00000056736	greenyellow
ENSG00000163833	greenyellow
ENSG00000171148	greenyellow
ENSG00000181789	greenyellow
ENSG00000114626	greenyellow
ENSG00000164054	greenyellow
ENSG00000163931	greenyellow
ENSG00000161202	greenyellow
ENSG00000163820	greenyellow
ENSG00000033867	greenyellow
ENSG00000230304	greenyellow
ENSG00000272602	greenyellow
ENSG00000071127	greenyellow
ENSG00000260296	greenyellow
ENSG00000131127	greenyellow
ENSG00000261490	greenyellow
ENSG00000109184	greenyellow
ENSG00000145241	greenyellow
ENSG00000250333	greenyellow
ENSG00000173597	greenyellow
ENSG00000249763	greenyellow
ENSG00000153064	greenyellow
ENSG00000169288	greenyellow
ENSG00000145348	greenyellow
ENSG00000245384	greenyellow
ENSG00000246541	greenyellow
ENSG00000198589	greenyellow
ENSG00000273472	greenyellow
ENSG00000278943	greenyellow
ENSG00000109738	greenyellow
ENSG00000232648	greenyellow
ENSG00000145414	greenyellow
ENSG00000287392	greenyellow
ENSG00000138698	greenyellow
ENSG00000164073	greenyellow
ENSG00000145375	greenyellow
ENSG00000068078	greenyellow
ENSG00000163291	greenyellow
ENSG00000157869	greenyellow
ENSG00000109618	greenyellow
ENSG00000152795	greenyellow
ENSG00000157426	greenyellow
ENSG00000163281	greenyellow
ENSG00000013810	greenyellow
ENSG00000168818	greenyellow
ENSG00000178988	greenyellow
ENSG00000137601	greenyellow
ENSG00000056050	greenyellow
ENSG00000270720	greenyellow
ENSG00000132463	greenyellow
ENSG00000138778	greenyellow
ENSG00000250317	greenyellow
ENSG00000124275	greenyellow
ENSG00000251629	greenyellow
ENSG00000248461	greenyellow
ENSG00000248898	greenyellow
ENSG00000253333	greenyellow
ENSG00000176928	greenyellow
ENSG00000249436	greenyellow
ENSG00000164258	greenyellow
ENSG00000164291	greenyellow
ENSG00000164902	greenyellow
ENSG00000113296	greenyellow
ENSG00000145675	greenyellow
ENSG00000072786	greenyellow
ENSG00000233913	greenyellow
ENSG00000145781	greenyellow
ENSG00000120318	greenyellow
ENSG00000161011	greenyellow
ENSG00000254333	greenyellow
ENSG00000196743	greenyellow
ENSG00000198055	greenyellow
ENSG00000196923	greenyellow
ENSG00000180104	greenyellow
ENSG00000081189	greenyellow
ENSG00000168944	greenyellow
ENSG00000196670	greenyellow
ENSG00000131446	greenyellow
ENSG00000153140	greenyellow
ENSG00000186334	greenyellow
ENSG00000169258	greenyellow
ENSG00000156475	greenyellow
ENSG00000152942	greenyellow
ENSG00000146094	greenyellow
ENSG00000049167	greenyellow
ENSG00000213523	greenyellow
ENSG00000169220	greenyellow
ENSG00000145743	greenyellow
ENSG00000131504	greenyellow
ENSG00000113758	greenyellow
ENSG00000153006	greenyellow
ENSG00000153015	greenyellow
ENSG00000213347	greenyellow
ENSG00000250072	greenyellow
ENSG00000183666	greenyellow
ENSG00000247828	greenyellow
ENSG00000226221	greenyellow
ENSG00000112685	greenyellow
ENSG00000206503	greenyellow
ENSG00000225339	greenyellow
ENSG00000188056	greenyellow
ENSG00000272316	greenyellow
ENSG00000203809	greenyellow
ENSG00000082293	greenyellow
ENSG00000178425	greenyellow
ENSG00000066651	greenyellow
ENSG00000232295	greenyellow
ENSG00000227954	greenyellow
ENSG00000112175	greenyellow
ENSG00000198225	greenyellow
ENSG00000124596	greenyellow
ENSG00000112195	greenyellow
ENSG00000215712	greenyellow
ENSG00000057663	greenyellow
ENSG00000010818	greenyellow
ENSG00000135596	greenyellow
ENSG00000213309	greenyellow
ENSG00000124767	greenyellow
ENSG00000288612	greenyellow
ENSG00000272341	greenyellow
ENSG00000111843	greenyellow
ENSG00000231113	greenyellow
ENSG00000124713	greenyellow
ENSG00000197498	greenyellow
ENSG00000112144	greenyellow
ENSG00000277157	greenyellow
ENSG00000204428	greenyellow
ENSG00000213722	greenyellow
ENSG00000204386	greenyellow
ENSG00000204592	greenyellow
ENSG00000082269	greenyellow
ENSG00000204264	greenyellow
ENSG00000240065	greenyellow
ENSG00000168131	greenyellow
ENSG00000204315	greenyellow
ENSG00000213654	greenyellow
ENSG00000146112	greenyellow
ENSG00000137312	greenyellow
ENSG00000124588	greenyellow
ENSG00000118507	greenyellow
ENSG00000112473	greenyellow
ENSG00000146433	greenyellow
ENSG00000204525	greenyellow
ENSG00000204305	greenyellow
ENSG00000137161	greenyellow
ENSG00000204469	greenyellow
ENSG00000197903	greenyellow
ENSG00000080546	greenyellow
ENSG00000227502	greenyellow
ENSG00000289368	greenyellow
ENSG00000288805	greenyellow
ENSG00000231769	greenyellow
ENSG00000234745	greenyellow
ENSG00000070882	greenyellow
ENSG00000233830	greenyellow
ENSG00000011426	greenyellow
ENSG00000127989	greenyellow
ENSG00000004766	greenyellow
ENSG00000105849	greenyellow
ENSG00000228204	greenyellow
ENSG00000232072	greenyellow
ENSG00000127990	greenyellow
ENSG00000146955	greenyellow
ENSG00000223566	greenyellow
ENSG00000211745	greenyellow
ENSG00000128534	greenyellow
ENSG00000211710	greenyellow
ENSG00000181444	greenyellow
ENSG00000164713	greenyellow
ENSG00000122787	greenyellow
ENSG00000226660	greenyellow
ENSG00000085514	greenyellow
ENSG00000105810	greenyellow
ENSG00000146757	greenyellow
ENSG00000006451	greenyellow
ENSG00000075624	greenyellow
ENSG00000106348	greenyellow
ENSG00000160993	greenyellow
ENSG00000161036	greenyellow
ENSG00000136279	greenyellow
ENSG00000086730	greenyellow
ENSG00000049541	greenyellow
ENSG00000165131	greenyellow
ENSG00000128609	greenyellow
ENSG00000106330	greenyellow
ENSG00000172354	greenyellow
ENSG00000146839	greenyellow
ENSG00000146828	greenyellow
ENSG00000105926	greenyellow
ENSG00000146833	greenyellow
ENSG00000234338	greenyellow
ENSG00000106460	greenyellow
ENSG00000174384	greenyellow
ENSG00000182487	greenyellow
ENSG00000130305	greenyellow
ENSG00000165178	greenyellow
ENSG00000005486	greenyellow
ENSG00000189077	greenyellow
ENSG00000158517	greenyellow
ENSG00000185811	greenyellow
ENSG00000126524	greenyellow
ENSG00000160999	greenyellow
ENSG00000033100	greenyellow
ENSG00000160991	greenyellow
ENSG00000048052	greenyellow
ENSG00000188186	greenyellow
ENSG00000214765	greenyellow
ENSG00000241764	greenyellow
ENSG00000106244	greenyellow
ENSG00000166925	greenyellow
ENSG00000183943	greenyellow
ENSG00000285899	greenyellow
ENSG00000188419	greenyellow
ENSG00000198934	greenyellow
ENSG00000068323	greenyellow
ENSG00000009694	greenyellow
ENSG00000196741	greenyellow
ENSG00000283743	greenyellow
ENSG00000203879	greenyellow
ENSG00000165197	greenyellow
ENSG00000185825	greenyellow
ENSG00000102032	greenyellow
ENSG00000126759	greenyellow
ENSG00000275882	greenyellow
ENSG00000122121	greenyellow
ENSG00000225031	greenyellow
ENSG00000187808	greenyellow
ENSG00000071553	greenyellow
ENSG00000288053	greenyellow
ENSG00000186376	greenyellow
ENSG00000156531	greenyellow
ENSG00000196632	greenyellow
ENSG00000130985	greenyellow
ENSG00000068308	greenyellow
ENSG00000068400	greenyellow
ENSG00000157514	greenyellow
ENSG00000166432	greenyellow
ENSG00000147059	greenyellow
ENSG00000227486	greenyellow
ENSG00000278530	greenyellow
ENSG00000102053	greenyellow
ENSG00000102317	greenyellow
ENSG00000015285	greenyellow
ENSG00000269335	greenyellow
ENSG00000160211	greenyellow
ENSG00000164741	greenyellow
ENSG00000147324	greenyellow
ENSG00000198791	greenyellow
ENSG00000147421	greenyellow
ENSG00000245857	greenyellow
ENSG00000085788	greenyellow
ENSG00000253205	greenyellow
ENSG00000164749	greenyellow
ENSG00000205189	greenyellow
ENSG00000253901	greenyellow
ENSG00000254380	greenyellow
ENSG00000123124	greenyellow
ENSG00000221869	greenyellow
ENSG00000147654	greenyellow
ENSG00000155897	greenyellow
ENSG00000181690	greenyellow
ENSG00000185900	greenyellow
ENSG00000147687	greenyellow
ENSG00000164830	greenyellow
ENSG00000180190	greenyellow
ENSG00000286681	greenyellow
ENSG00000155189	greenyellow
ENSG00000173535	greenyellow
ENSG00000228801	greenyellow
ENSG00000169139	greenyellow
ENSG00000120158	greenyellow
ENSG00000165233	greenyellow
ENSG00000172159	greenyellow
ENSG00000158079	greenyellow
ENSG00000130222	greenyellow
ENSG00000095209	greenyellow
ENSG00000204802	greenyellow
ENSG00000237626	greenyellow
ENSG00000131669	greenyellow
ENSG00000197969	greenyellow
ENSG00000095380	greenyellow
ENSG00000136925	greenyellow
ENSG00000235819	greenyellow
ENSG00000230782	greenyellow
ENSG00000285987	greenyellow
ENSG00000148175	greenyellow
ENSG00000106771	greenyellow
ENSG00000160563	greenyellow
ENSG00000186350	greenyellow
ENSG00000228714	greenyellow
ENSG00000095383	greenyellow
ENSG00000160339	greenyellow
ENSG00000095370	greenyellow
ENSG00000122694	greenyellow
ENSG00000227463	greenyellow
ENSG00000137076	greenyellow
ENSG00000188229	greenyellow
ENSG00000198113	greenyellow
ENSG00000165209	greenyellow
ENSG00000169692	greenyellow
ENSG00000107077	greenyellow
ENSG00000148187	greenyellow
ENSG00000148180	greenyellow
ENSG00000175893	greenyellow
ENSG00000148356	greenyellow
ENSG00000165280	greenyellow
ENSG00000212864	greenyellow
ENSG00000167110	greenyellow
ENSG00000232104	greenyellow
ENSG00000126883	greenyellow
ENSG00000182150	greenyellow
ENSG00000171889	greenyellow
ENSG00000255036	greenyellow
ENSG00000170946	greenyellow
ENSG00000109911	greenyellow
ENSG00000255139	greenyellow
ENSG00000121690	greenyellow
ENSG00000166889	greenyellow
ENSG00000243802	greenyellow
ENSG00000110719	greenyellow
ENSG00000169519	greenyellow
ENSG00000162139	greenyellow
ENSG00000182359	greenyellow
ENSG00000254416	greenyellow
ENSG00000110057	greenyellow
ENSG00000186642	greenyellow
ENSG00000154144	greenyellow
ENSG00000133884	greenyellow
ENSG00000085117	greenyellow
ENSG00000062282	greenyellow
ENSG00000168071	greenyellow
ENSG00000110047	greenyellow
ENSG00000177156	greenyellow
ENSG00000149308	greenyellow
ENSG00000130592	greenyellow
ENSG00000110628	greenyellow
ENSG00000121653	greenyellow
ENSG00000175573	greenyellow
ENSG00000087365	greenyellow
ENSG00000174871	greenyellow
ENSG00000110619	greenyellow
ENSG00000137760	greenyellow
ENSG00000175274	greenyellow
ENSG00000188070	greenyellow
ENSG00000185507	greenyellow
ENSG00000156599	greenyellow
ENSG00000162236	greenyellow
ENSG00000149781	greenyellow
ENSG00000066336	greenyellow
ENSG00000175536	greenyellow
ENSG00000134809	greenyellow
ENSG00000186104	greenyellow
ENSG00000172977	greenyellow
ENSG00000254470	greenyellow
ENSG00000110446	greenyellow
ENSG00000177105	greenyellow
ENSG00000230724	greenyellow
ENSG00000256347	greenyellow
ENSG00000142089	greenyellow
ENSG00000268403	greenyellow
ENSG00000149489	greenyellow
ENSG00000186635	greenyellow
ENSG00000160703	greenyellow
ENSG00000172367	greenyellow
ENSG00000172932	greenyellow
ENSG00000172830	greenyellow
ENSG00000166340	greenyellow
ENSG00000179240	greenyellow
ENSG00000198561	greenyellow
ENSG00000149089	greenyellow
ENSG00000175224	greenyellow
ENSG00000118058	greenyellow
ENSG00000173327	greenyellow
ENSG00000213445	greenyellow
ENSG00000054938	greenyellow
ENSG00000110492	greenyellow
ENSG00000130598	greenyellow
ENSG00000142186	greenyellow
ENSG00000165458	greenyellow
ENSG00000185201	greenyellow
ENSG00000170145	greenyellow
ENSG00000162105	greenyellow
ENSG00000156738	greenyellow
ENSG00000229719	greenyellow
ENSG00000130600	greenyellow
ENSG00000255062	greenyellow
ENSG00000162300	greenyellow
ENSG00000014216	greenyellow
ENSG00000228636	greenyellow
ENSG00000123243	greenyellow
ENSG00000165322	greenyellow
ENSG00000122359	greenyellow
ENSG00000138326	greenyellow
ENSG00000107771	greenyellow
ENSG00000155629	greenyellow
ENSG00000276805	greenyellow
ENSG00000165879	greenyellow
ENSG00000052749	greenyellow
ENSG00000171314	greenyellow
ENSG00000181274	greenyellow
ENSG00000166272	greenyellow
ENSG00000288107	greenyellow
ENSG00000196177	greenyellow
ENSG00000119965	greenyellow
ENSG00000077150	greenyellow
ENSG00000138107	greenyellow
ENSG00000095464	greenyellow
ENSG00000148690	greenyellow
ENSG00000173145	greenyellow
ENSG00000015171	greenyellow
ENSG00000173239	greenyellow
ENSG00000204020	greenyellow
ENSG00000150760	greenyellow
ENSG00000279088	greenyellow
ENSG00000214655	greenyellow
ENSG00000156510	greenyellow
ENSG00000133678	greenyellow
ENSG00000189129	greenyellow
ENSG00000263482	greenyellow
ENSG00000148660	greenyellow
ENSG00000151651	greenyellow
ENSG00000226086	greenyellow
ENSG00000197746	greenyellow
ENSG00000107643	greenyellow
ENSG00000152766	greenyellow
ENSG00000255624	greenyellow
ENSG00000231131	greenyellow
ENSG00000225850	greenyellow
ENSG00000134470	greenyellow
ENSG00000256356	greenyellow
ENSG00000256667	greenyellow
ENSG00000139146	greenyellow
ENSG00000111371	greenyellow
ENSG00000111605	greenyellow
ENSG00000067798	greenyellow
ENSG00000133773	greenyellow
ENSG00000257747	greenyellow
ENSG00000008405	greenyellow
ENSG00000188026	greenyellow
ENSG00000139324	greenyellow
ENSG00000111727	greenyellow
ENSG00000139726	greenyellow
ENSG00000185482	greenyellow
ENSG00000258830	greenyellow
ENSG00000123329	greenyellow
ENSG00000166986	greenyellow
ENSG00000166908	greenyellow
ENSG00000174099	greenyellow
ENSG00000090612	greenyellow
ENSG00000111679	greenyellow
ENSG00000166888	greenyellow
ENSG00000067182	greenyellow
ENSG00000110876	greenyellow
ENSG00000135404	greenyellow
ENSG00000111321	greenyellow
ENSG00000256433	greenyellow
ENSG00000089693	greenyellow
ENSG00000120837	greenyellow
ENSG00000139190	greenyellow
ENSG00000174206	greenyellow
ENSG00000139220	greenyellow
ENSG00000135114	greenyellow
ENSG00000111229	greenyellow
ENSG00000186298	greenyellow
ENSG00000256072	greenyellow
ENSG00000150977	greenyellow
ENSG00000198673	greenyellow
ENSG00000123106	greenyellow
ENSG00000111348	greenyellow
ENSG00000150991	greenyellow
ENSG00000111737	greenyellow
ENSG00000257258	greenyellow
ENSG00000069493	greenyellow
ENSG00000110848	greenyellow
ENSG00000256862	greenyellow
ENSG00000255801	greenyellow
ENSG00000234608	greenyellow
ENSG00000184293	greenyellow
ENSG00000110888	greenyellow
ENSG00000165475	greenyellow
ENSG00000102554	greenyellow
ENSG00000214182	greenyellow
ENSG00000169062	greenyellow
ENSG00000150510	greenyellow
ENSG00000139746	greenyellow
ENSG00000132965	greenyellow
ENSG00000185896	greenyellow
ENSG00000132953	greenyellow
ENSG00000276476	greenyellow
ENSG00000286757	greenyellow
ENSG00000198252	greenyellow
ENSG00000261208	greenyellow
ENSG00000258537	greenyellow
ENSG00000258919	greenyellow
ENSG00000258869	greenyellow
ENSG00000100522	greenyellow
ENSG00000278661	greenyellow
ENSG00000211886	greenyellow
ENSG00000197324	greenyellow
ENSG00000139890	greenyellow
ENSG00000100461	greenyellow
ENSG00000100605	greenyellow
ENSG00000100722	greenyellow
ENSG00000213903	greenyellow
ENSG00000139974	greenyellow
ENSG00000119686	greenyellow
ENSG00000092140	greenyellow
ENSG00000197249	greenyellow
ENSG00000126787	greenyellow
ENSG00000174373	greenyellow
ENSG00000012983	greenyellow
ENSG00000072110	greenyellow
ENSG00000211793	greenyellow
ENSG00000211800	greenyellow
ENSG00000100918	greenyellow
ENSG00000100439	greenyellow
ENSG00000259687	greenyellow
ENSG00000224078	greenyellow
ENSG00000134146	greenyellow
ENSG00000258461	greenyellow
ENSG00000284540	greenyellow
ENSG00000104043	greenyellow
ENSG00000104142	greenyellow
ENSG00000140368	greenyellow
ENSG00000287926	greenyellow
ENSG00000140553	greenyellow
ENSG00000137767	greenyellow
ENSG00000166887	greenyellow
ENSG00000286973	greenyellow
ENSG00000179455	greenyellow
ENSG00000140471	greenyellow
ENSG00000182511	greenyellow
ENSG00000137871	greenyellow
ENSG00000181827	greenyellow
ENSG00000166145	greenyellow
ENSG00000103653	greenyellow
ENSG00000259156	greenyellow
ENSG00000166664	greenyellow
ENSG00000128731	greenyellow
ENSG00000174197	greenyellow
ENSG00000137815	greenyellow
ENSG00000260232	greenyellow
ENSG00000259704	greenyellow
ENSG00000140416	greenyellow
ENSG00000259713	greenyellow
ENSG00000166813	greenyellow
ENSG00000090905	greenyellow
ENSG00000260141	greenyellow
ENSG00000261405	greenyellow
ENSG00000261512	greenyellow
ENSG00000103111	greenyellow
ENSG00000103187	greenyellow
ENSG00000213937	greenyellow
ENSG00000103496	greenyellow
ENSG00000260911	greenyellow
ENSG00000103507	greenyellow
ENSG00000103490	greenyellow
ENSG00000275654	greenyellow
ENSG00000261419	greenyellow
ENSG00000278528	greenyellow
ENSG00000260908	greenyellow
ENSG00000149923	greenyellow
ENSG00000102886	greenyellow
ENSG00000102882	greenyellow
ENSG00000261203	greenyellow
ENSG00000169221	greenyellow
ENSG00000006327	greenyellow
ENSG00000184602	greenyellow
ENSG00000247228	greenyellow
ENSG00000072864	greenyellow
ENSG00000158792	greenyellow
ENSG00000075399	greenyellow
ENSG00000131165	greenyellow
ENSG00000169180	greenyellow
ENSG00000157335	greenyellow
ENSG00000159625	greenyellow
ENSG00000140854	greenyellow
ENSG00000135723	greenyellow
ENSG00000262332	greenyellow
ENSG00000133393	greenyellow
ENSG00000156858	greenyellow
ENSG00000156860	greenyellow
ENSG00000188603	greenyellow
ENSG00000103549	greenyellow
ENSG00000189067	greenyellow
ENSG00000166188	greenyellow
ENSG00000086504	greenyellow
ENSG00000224470	greenyellow
ENSG00000013364	greenyellow
ENSG00000135709	greenyellow
ENSG00000286808	greenyellow
ENSG00000159720	greenyellow
ENSG00000157322	greenyellow
ENSG00000198736	greenyellow
ENSG00000183971	greenyellow
ENSG00000183921	greenyellow
ENSG00000197302	greenyellow
ENSG00000260528	greenyellow
ENSG00000124074	greenyellow
ENSG00000141096	greenyellow
ENSG00000167261	greenyellow
ENSG00000051523	greenyellow
ENSG00000102879	greenyellow
ENSG00000141012	greenyellow
ENSG00000187741	greenyellow
ENSG00000108405	greenyellow
ENSG00000177731	greenyellow
ENSG00000177302	greenyellow
ENSG00000267261	greenyellow
ENSG00000231256	greenyellow
ENSG00000267659	greenyellow
ENSG00000175175	greenyellow
ENSG00000154265	greenyellow
ENSG00000166263	greenyellow
ENSG00000129245	greenyellow
ENSG00000157637	greenyellow
ENSG00000167080	greenyellow
ENSG00000170043	greenyellow
ENSG00000176170	greenyellow
ENSG00000141574	greenyellow
ENSG00000178927	greenyellow
ENSG00000092929	greenyellow
ENSG00000180891	greenyellow
ENSG00000109111	greenyellow
ENSG00000185359	greenyellow
ENSG00000232724	greenyellow
ENSG00000170190	greenyellow
ENSG00000125449	greenyellow
ENSG00000189159	greenyellow
ENSG00000177885	greenyellow
ENSG00000141480	greenyellow
ENSG00000068120	greenyellow
ENSG00000184619	greenyellow
ENSG00000267121	greenyellow
ENSG00000161664	greenyellow
ENSG00000168591	greenyellow
ENSG00000185262	greenyellow
ENSG00000126561	greenyellow
ENSG00000108479	greenyellow
ENSG00000159842	greenyellow
ENSG00000214226	greenyellow
ENSG00000030582	greenyellow
ENSG00000132589	greenyellow
ENSG00000136492	greenyellow
ENSG00000040633	greenyellow
ENSG00000175826	greenyellow
ENSG00000270240	greenyellow
ENSG00000170412	greenyellow
ENSG00000167851	greenyellow
ENSG00000108840	greenyellow
ENSG00000184060	greenyellow
ENSG00000108679	greenyellow
ENSG00000171302	greenyellow
ENSG00000179314	greenyellow
ENSG00000159314	greenyellow
ENSG00000168256	greenyellow
ENSG00000168646	greenyellow
ENSG00000174238	greenyellow
ENSG00000141562	greenyellow
ENSG00000184922	greenyellow
ENSG00000277791	greenyellow
ENSG00000273559	greenyellow
ENSG00000198933	greenyellow
ENSG00000198863	greenyellow
ENSG00000233098	greenyellow
ENSG00000108523	greenyellow
ENSG00000129250	greenyellow
ENSG00000171298	greenyellow
ENSG00000141401	greenyellow
ENSG00000141380	greenyellow
ENSG00000265936	greenyellow
ENSG00000177426	greenyellow
ENSG00000175322	greenyellow
ENSG00000130856	greenyellow
ENSG00000122490	greenyellow
ENSG00000166377	greenyellow
ENSG00000263753	greenyellow
ENSG00000088812	greenyellow
ENSG00000286022	greenyellow
ENSG00000101474	greenyellow
ENSG00000089123	greenyellow
ENSG00000235415	greenyellow
ENSG00000088298	greenyellow
ENSG00000287335	greenyellow
ENSG00000125970	greenyellow
[truncated: 2,970 more rows]
